# Supplementary material for: In Vitro Fermentation of Selected Prebiotics and Their Effects on the Composition and Activity of the Adult Gut Microbiota
Source: PubMed Central journal article supplement (PMC6213619; doi:10.3390/ijms19103097), 2018-10-10
Supplement: ijms-19-03097-s001.pdf [file ijms-19-03097-s001.pdf]

## Supplementary

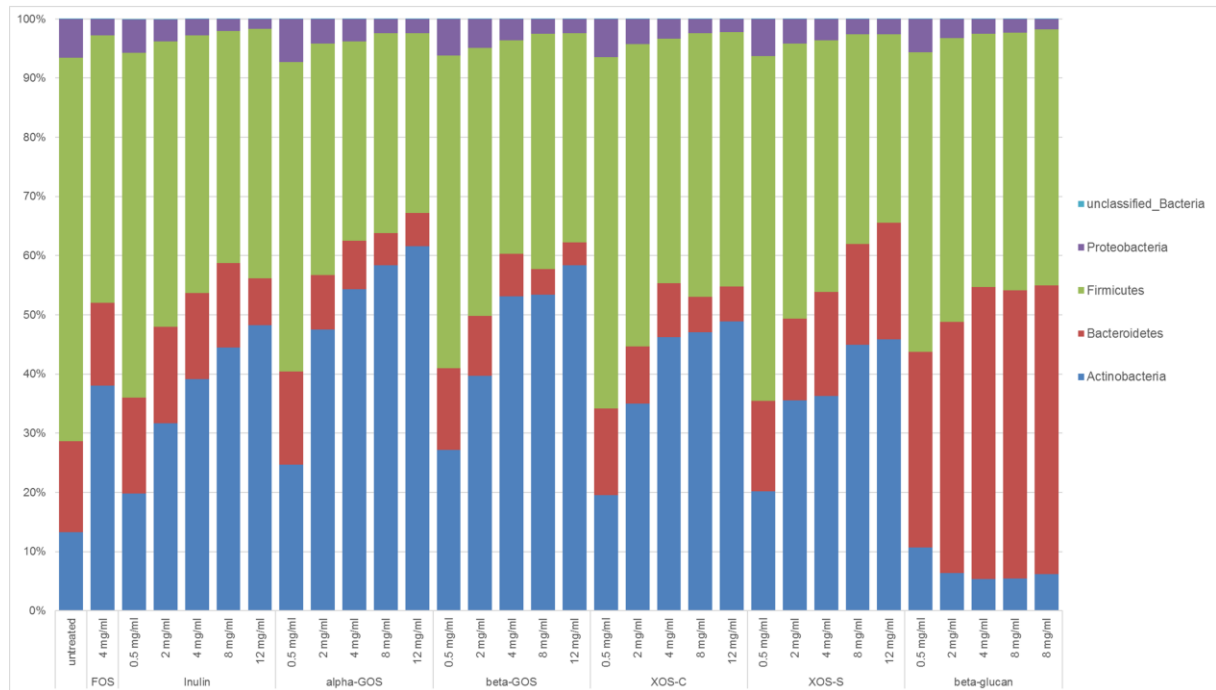

Figure S1. Sequencing Phylum.

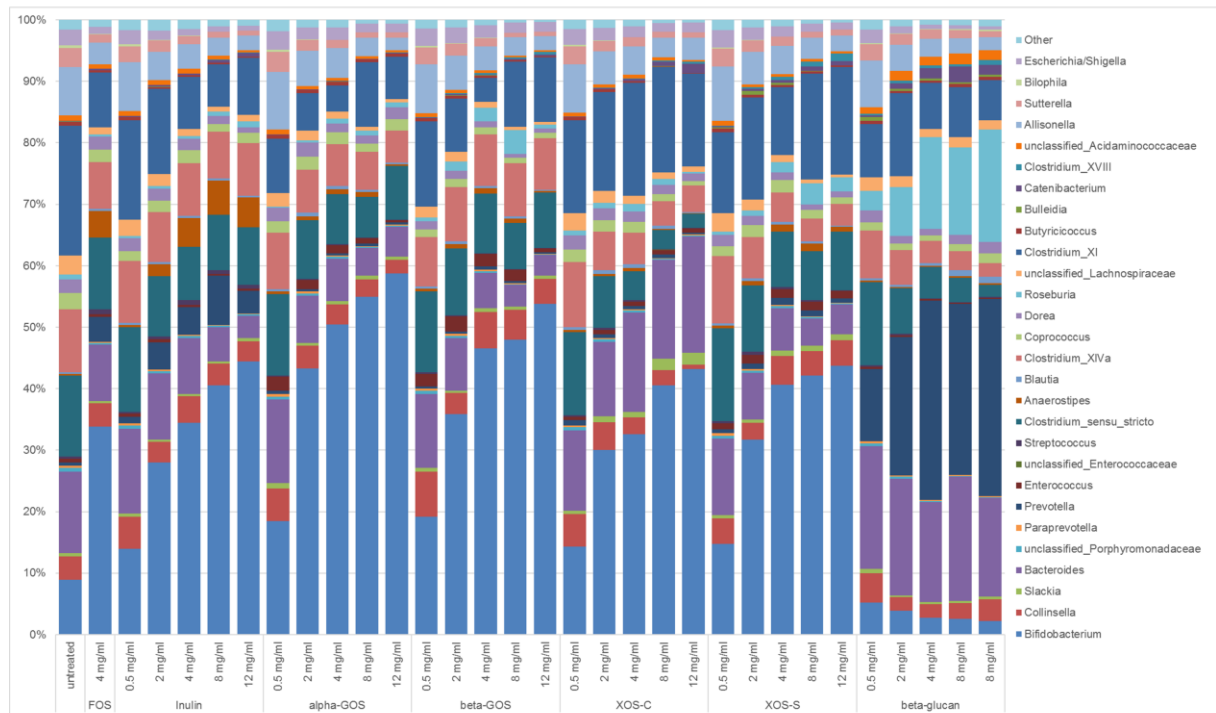

Figure S2. Sequencing Genus.

**Table S1.** Mean Shannon diversity index of all samples. Values are expressed as the mean  $\pm$  standard deviation obtained from the average of duplicate (inulin, alpha-GOS, beta-GOS, XOS-C, XOS-S, beta-glucan) or triplicate (control and FOS) samples.

| <b>Condition</b> | <b>Concentration</b> | <b>Shannon index</b> |
|------------------|----------------------|----------------------|
| Untreated        |                      | 5.14 $\pm$ 0.42      |
| FOS              | 4                    | 5.22 $\pm$ 0.13      |
| Inulin           | 0.5                  | 5.27 $\pm$ 0.31      |
|                  | 2                    | 4.72 $\pm$ 0.26      |
|                  | 4                    | 4.91 $\pm$ 0.90      |
|                  | 8                    | 4.40 $\pm$ 0.51      |
|                  | 12                   | 4.18 $\pm$ 0.29      |
| Alpha-GOS        | 0.5                  | 5.85 $\pm$ 0.12      |
|                  | 2                    | 5.10 $\pm$ 0.09      |
|                  | 4                    | 4.84 $\pm$ 0.69      |
|                  | 8                    | 4.43 $\pm$ 0.40      |
|                  | 12                   | 4.13 $\pm$ 0.21      |
| Beta-GOS         | 0.5                  | 5.67 $\pm$ 0.05      |
|                  | 2                    | 4.74 $\pm$ 0.34      |
|                  | 4                    | 4.89 $\pm$ 0.60      |
|                  | 8                    | 4.54 $\pm$ 0.01      |
|                  | 12                   | 4.31 $\pm$ 0.01      |
| XOS-C            | 0.5                  | 5.25 $\pm$ 0.65      |
|                  | 2                    | 4.72 $\pm$ 0.25      |
|                  | 4                    | 5.20 $\pm$ 0.62      |
|                  | 8                    | 4.72 $\pm$ 0.88      |
|                  | 12                   | 4.81 $\pm$ 0.10      |
| XOS-S            | 0.5                  | 5.25 $\pm$ 0.60      |
|                  | 2                    | 5.41 $\pm$ 0.21      |
|                  | 4                    | 4.76 $\pm$ 0.23      |
|                  | 8                    | 5.21 $\pm$ 0.26      |
|                  | 12                   | 4.50 $\pm$ 0.23      |
| Beta-glucan      | 0.5                  | 5.53 $\pm$ 0.59      |
|                  | 2                    | 4.76 $\pm$ 0.54      |
|                  | 4                    | 4.44 $\pm$ 0.72      |
|                  | 8                    | 5.51 $\pm$ 0.38      |
|                  | 12                   | 4.93 $\pm$ 0.82      |

**Table S2.** Mean metabolite concentrations (mg/ml) of all samples. Values are expressed as the mean  $\pm$  standard deviation obtained from the average of duplicate (inulin, alpha-GOS, beta-GOS, XOS-C, XOS-S, beta-glucan) or triplicate (control and FOS) sample.

| Condition   | Concentration | Acetate           | Propionate       | n-Butyrate       | i-Valerate      | i-Butyrate      |
|-------------|---------------|-------------------|------------------|------------------|-----------------|-----------------|
| Untreated   |               | 5.14 $\pm$ 0.42   | 8.43 $\pm$ 0.76  | 8.03 $\pm$ 0.96  | 3.82 $\pm$ 0.57 | 1.39 $\pm$ 0.18 |
| FOS         | 4             | 55.22 $\pm$ 5.34  | 11.41 $\pm$ 0.55 | 13.56 $\pm$ 0.08 | 3.09 $\pm$ 0.07 | 1.19 $\pm$ 0.07 |
| Inulin      | 0.5           | 54.34 $\pm$ 2.95  | 7.34 $\pm$ 2.96  | 7.89 $\pm$ 0.51  | 3.78 $\pm$ 0.48 | 1.40 $\pm$ 0.04 |
|             | 2             | 63.98 $\pm$ 1.26  | 9.61 $\pm$ 0.13  | 9.24 $\pm$ 0.67  | 3.00 $\pm$ 0.10 | 1.26 $\pm$ 0.03 |
|             | 4             | 83.17 $\pm$ 2.74  | 10.84 $\pm$ 0.25 | 14.73 $\pm$ 0.75 | 3.50 $\pm$ 0.15 | 0.57 $\pm$ 0.20 |
|             | 8             | 86.30 $\pm$ 1.07  | 9.58 $\pm$ 0.02  | 18.36 $\pm$ 1.66 | 2.06 $\pm$ 0.10 | 0.64 $\pm$ 0.09 |
|             | 12            | 94.49 $\pm$ 0.53  | 8.29 $\pm$ 0.10  | 25.45 $\pm$ 0.28 | 1.94 $\pm$ 0.14 | 0.63 $\pm$ 0.04 |
| Alpha-GOS   | 0.5           | 52.02 $\pm$ 0.66  | 7.03 $\pm$ 0.17  | 7.65 $\pm$ 0.05  | 3.19 $\pm$ 0.12 | 1.12 $\pm$ 0.04 |
|             | 2             | 61.78 $\pm$ 2.88  | 6.48 $\pm$ 0.28  | 9.89 $\pm$ 0.65  | 2.52 $\pm$ 0.01 | 0.77 $\pm$ 0.12 |
|             | 4             | 77.07 $\pm$ 5.19  | 6.50 $\pm$ 0.37  | 14.30 $\pm$ 1.03 | 2.56 $\pm$ 0.03 | 0.45 $\pm$ 0.01 |
|             | 8             | 97.81 $\pm$ 3.15  | 4.94 $\pm$ 0.04  | 13.54 $\pm$ 0.59 | 1.74 $\pm$ 0.11 | 0.56 $\pm$ 0.16 |
|             | 12            | 135.09 $\pm$ 1.11 | 5.56 $\pm$ 0.23  | 11.47 $\pm$ 2.25 | 1.50 $\pm$ 0.06 | 0.63 $\pm$ 0.10 |
| Beta-GOS    | 0.5           | 51.78 $\pm$ 0.32  | 6.81 $\pm$ 0.50  | 7.73 $\pm$ 0.03  | 3.31 $\pm$ 0.10 | 1.15 $\pm$ 0.01 |
|             | 2             | 59.12 $\pm$ 1.25  | 6.73 $\pm$ 0.09  | 9.51 $\pm$ 0.39  | 2.38 $\pm$ 0.06 | 0.68 $\pm$ 0.02 |
|             | 4             | 66.52 $\pm$ 1.64  | 6.03 $\pm$ 0.16  | 12.71 $\pm$ 1.09 | 1.93 $\pm$ 0.04 | 0.66 $\pm$ 0.01 |
|             | 8             | 87.13 $\pm$ 0.15  | 4.23 $\pm$ 1.28  | 18.56 $\pm$ 0.06 | 1.53 $\pm$ 0.05 | 0.68 $\pm$ 0.10 |
|             | 12            | 114.41 $\pm$ 2.88 | 3.30 $\pm$ 1.38  | 13.06 $\pm$ 0.07 | 1.07 $\pm$ 0.05 | 0.40 $\pm$ 0.08 |
| XOS-C       | 0.5           | 54.69 $\pm$ 2.92  | 7.25 $\pm$ 0.27  | 8.16 $\pm$ 0.58  | 3.41 $\pm$ 0.32 | 1.26 $\pm$ 0.25 |
|             | 2             | 63.41 $\pm$ 0.48  | 6.91 $\pm$ 0.03  | 9.89 $\pm$ 0.38  | 2.70 $\pm$ 0.10 | 0.88 $\pm$ 0.09 |
|             | 4             | 84.43 $\pm$ 1.35  | 7.95 $\pm$ 0.50  | 16.40 $\pm$ 1.33 | 2.51 $\pm$ 0.07 | 0.90 $\pm$ 0.08 |
|             | 8             | 82.82 $\pm$ 6.82  | 4.83 $\pm$ 0.96  | 16.62 $\pm$ 0.85 | 1.26 $\pm$ 0.10 | 0.17 $\pm$ 0.05 |
|             | 12            | 105.61 $\pm$ 0.20 | 5.18 $\pm$ 0.09  | 16.00 $\pm$ 3.95 | 0.91 $\pm$ 0.06 | 0.25 $\pm$ 0.08 |
| XOS-S       | 0.5           | 52.73 $\pm$ 0.46  | 6.99 $\pm$ 0.60  | 7.41 $\pm$ 0.15  | 3.36 $\pm$ 0.14 | 0.66 $\pm$ 0.06 |
|             | 2             | 68.50 $\pm$ 1.03  | 8.29 $\pm$ 0.26  | 8.58 $\pm$ 0.05  | 3.11 $\pm$ 0.08 | 0.62 $\pm$ 0.31 |
|             | 4             | 81.90 $\pm$ 0.44  | 9.36 $\pm$ 0.31  | 9.71 $\pm$ 0.10  | 2.58 $\pm$ 0.03 | 0.62 $\pm$ 0.50 |
|             | 8             | 110.11 $\pm$ 3.16 | 9.71 $\pm$ 0.13  | 10.68 $\pm$ 0.47 | 1.76 $\pm$ 0.05 | 0.35 $\pm$ 0.27 |
|             | 12            | 157.10 $\pm$ 0.95 | 11.00 $\pm$ 0.43 | 10.48 $\pm$ 0.33 | 1.28 $\pm$ 0.05 | 0.45 $\pm$ 0.02 |
| Beta-glucan | 0.5           | 52.96 $\pm$ 0.59  | 11.75 $\pm$ 0.26 | 8.68 $\pm$ 0.08  | 3.39 $\pm$ 0.03 | 1.17 $\pm$ 0.00 |
|             | 2             | 63.71 $\pm$ 1.17  | 20.27 $\pm$ 0.86 | 11.79 $\pm$ 0.61 | 3.85 $\pm$ 0.02 | 1.17 $\pm$ 0.14 |
|             | 4             | 80.17 $\pm$ 2.10  | 31.04 $\pm$ 0.39 | 19.26 $\pm$ 2.20 | 4.42 $\pm$ 0.07 | 1.53 $\pm$ 0.04 |
|             | 8             | 79.12 $\pm$ 2.31  | 32.22 $\pm$ 7.91 | 19.08 $\pm$ 2.56 | 4.13 $\pm$ 0.60 | 1.73 $\pm$ 0.18 |
|             | 12            | 90.25 $\pm$ 0.79  | 32.17 $\pm$ 2.86 | 25.07 $\pm$ 2.69 | 5.77 $\pm$ 0.32 | 2.41 $\pm$ 0.29 |

**Table S3.** Primers and probes used for enumeration of bacterial groups by qPCR

| Target                       | Forward primer                                  | Reverse primer                               | Probe                                   | Chemistry | Reference |
|------------------------------|-------------------------------------------------|----------------------------------------------|-----------------------------------------|-----------|-----------|
| Total bacteria (16S uni1)    | 5'<br>CGAAAGCGTG<br>GGGAGCAA<br>3'              | 5'<br>GTTCGTACTC<br>CCCAGGCGG<br>3'          | 5'<br>ATTAGATACC<br>CTGGTAGTCC<br>A 3'  | FAM/MGB   | [1]       |
| <i>Lactobacillus</i> group 1 | 23S-LBgr1-F<br>CGCCGMAAG<br>ACTAAGGTTT<br>CCT   | 23S-LBgr1-R<br>GCCTYRCCTT<br>AGGTCCCG        | 23S-LBgr1-probe<br>AGGCTCGTCC<br>GCCAG  | FAM/MGB   | TNO       |
| <i>Lactobacillus</i> group 2 | 23S-LBgr2-F<br>CCACCGWAT<br>GACTAAGGTT<br>TCCTG | 23S-LBgr2-R<br>GGCCTCGVCT<br>TAGRTCCC        | 23S-LBgr2-probe<br>AGGCTCGTCC<br>TCCCAG | VIC/MGB   | TNO       |
| <i>Bifidobacterium</i>       | IS-aIIbif-F<br>GGGATGCTG<br>GTGTGGAAGA<br>GA    | IS-aIIbif-R<br>TGCTCGCGTC<br>CACTATCCAG<br>T | IS-aIIbif<br>TCAAAC<br>CACCACGCG<br>CCA | FAM/MGB   | [2]       |

TNO, The Netherlands Organization for Applied Scientific Research

## References

1. de Oliveira, J.E.; van der Hoeven-Hangoor, E.; van de Linde, I.B.; Montijn, R.C.; van der Vossen, J.M. In ovo inoculation of chicken embryos with probiotic bacteria and its effect on posthatch Salmonella susceptibility. *Poult Sci* **2014**, *93*, 818-829.
2. Haarman, M.; Knol, J. Quantitative real-time PCR assays to identify and quantify fecal *Bifidobacterium* species in infants receiving a prebiotic infant formula. *Appl Environ Microbiol* **2005**, *71*, 2318-2324.
